1 **Environmental DNA (eDNA) metabarcoding of pond water as a tool to**  
2 **survey conservation and management priority mammals**

3

4 **Lynsey R. Harper<sup>a,b\*</sup>, Lori Lawson Handley<sup>a</sup>, Angus I. Carpenter<sup>c</sup>, Muhammad Ghazali<sup>d</sup>, Cristina**  
5 **Di Muri<sup>a</sup>, Callum J. Macgregor<sup>e</sup>, Thomas W. Logan<sup>a</sup>, Alan Law<sup>f</sup>, Thomas Breithaupt<sup>a</sup>, Daniel S.**  
6 **Read<sup>g</sup>, Allan D. McDevitt<sup>h</sup>, and Bernd Hänfling<sup>a</sup>**

7

8 <sup>a</sup> Department of Biological and Marine Sciences, University of Hull, Hull, HU6 7RX, UK

9 <sup>b</sup> Illinois Natural History Survey, Prairie Research Institute, University of Illinois at Urbana-Champaign, Champaign,  
10 Illinois, USA

11 <sup>c</sup> Wildwood Trust, Canterbury Rd, Herne Common, Herne Bay, CT6 7LQ, UK

12 <sup>d</sup> The Royal Zoological Society of Scotland, Edinburgh Zoo, 134 Corstorphine Road, Edinburgh, EH12 6TS, UK

13 <sup>e</sup> Department of Biology, University of York, Wentworth Way, York, YO10 5DD, UK

14 <sup>f</sup> Biological and Environmental Sciences, University of Stirling, Stirling, FK9 4LA, UK

15 <sup>g</sup> Centre for Ecology & Hydrology (CEH), Benson Lane, Crowmarsh Gifford, Wallingford, Oxfordshire, OX10 8BB, UK

16 <sup>h</sup> Ecosystems and Environment Research Centre, School of Science, Engineering and Environment, University of  
17 Salford, Salford, M5 4WT, UK

18

19 **\*Corresponding author: [lynsey.harper2@gmail.com](mailto:lynsey.harper2@gmail.com)**

20 Lynsey Harper, Department of Biological and Marine Sciences, University of Hull, Hull, HU6 7RX,

21 UK

22

23

## 24 **Abstract**

25

26 Environmental DNA (eDNA) metabarcoding can identify terrestrial taxa utilising aquatic habitats  
27 alongside aquatic communities, but terrestrial species' eDNA dynamics are understudied. We  
28 evaluated eDNA metabarcoding for monitoring semi-aquatic and terrestrial mammals,  
29 specifically nine species of conservation or management concern, and examined  
30 spatiotemporal variation in mammal eDNA signals. We hypothesised eDNA signals would be  
31 stronger for semi-aquatic than terrestrial mammals, and at sites where individuals exhibited  
32 behaviours. In captivity, we sampled waterbodies at points where behaviours were observed  
33 ('directed' sampling) and at equidistant intervals along the shoreline ('stratified' sampling). We  
34 surveyed natural ponds ( $N = 6$ ) where focal species were present using stratified water  
35 sampling, camera traps, and field signs. eDNA samples were metabarcoded using vertebrate-  
36 specific primers. All focal species were detected in captivity. eDNA signal strength did not differ  
37 between directed and stratified samples across or within species, between semi-aquatic or  
38 terrestrial species, or according to behaviours. eDNA was evenly distributed in artificial  
39 waterbodies, but unevenly distributed in natural ponds. Survey methods deployed at natural  
40 ponds shared three species detections. Metabarcoding missed badger and red fox recorded by  
41 cameras and field signs, but detected small mammals these tools overlooked, e.g. water vole.  
42 Terrestrial mammal eDNA signals were weaker and detected less frequently than semi-aquatic  
43 mammal eDNA signals. eDNA metabarcoding could enhance mammal monitoring through  
44 large-scale, multi-species distribution assessment for priority and difficult to survey species, and  
45 provide early indication of range expansions or contractions. However, eDNA surveys need high

46 spatiotemporal resolution and metabarcoding biases require further investigation before  
47 routine implementation.

48

49 **Key-words:** camera traps, field signs, lentic, monitoring, semi-aquatic mammals, terrestrial  
50 mammals

51

## 52 **1. Introduction**

53

54 Mammals are a highly threatened taxon, with 25% of species at risk of extinction globally due  
55 to harvesting, habitat degradation/loss, non-native species or perception as pests (Visconti et  
56 al., 2011). Most species lack long-term, systematic monitoring, with survey efforts biased  
57 towards rare species (Massimino, Harris, & Gillings, 2018). Data deficiency prevents robust  
58 estimation of mammalian range expansions/declines and population trends (Bland, Collen,  
59 Orme, & Bielby, 2015). Therefore, effective and evidence-based strategies for mammal  
60 conservation and management are urgently needed (Mathews et al., 2018).

61 Many mammals are nocturnal and elusive thus monitoring requires non-invasive,  
62 observational methods such as camera traps and field signs, e.g. footprints, scat (Caravaggi et  
63 al., 2018; Harris & Yalden, 2004; Kinoshita et al., 2019; Sadlier, Webbon, Baker, & Harris, 2004).  
64 Camera trapping is cost-efficient, standardised, reproducible, and produces data suited to site  
65 occupancy modelling, but only surveys a fraction of large, heterogeneous landscapes. Trap  
66 placement can substantially influence species detection probabilities, and traps often miss  
67 small species (Burton et al., 2015; Caravaggi et al., 2018; Ishige et al., 2017; Leempoel, Hebert,  
68 & Hadly, 2019). Field sign surveys are inexpensive, but resource-intensive for broad geographic  
69 coverage (Kinoshita et al., 2019; Sadlier et al., 2004). Species can have similar footprints and  
70 scat, increasing the potential for misidentification (Franklin et al., 2019; Harris & Yalden, 2004).  
71 Mammal survey methods can be species-specific, thus multiple methods are necessary for  
72 large-scale, multi-species monitoring schemes (Massimino et al., 2018; Sales et al., 2019).

73 Environmental DNA (eDNA) analysis is a recognised tool for rapid, non-invasive, cost-

74 efficient biodiversity assessment across aquatic and terrestrial ecosystems (Deiner et al., 2017).  
75 Organisms transfer genetic material to their environment via secretions, excretions, gametes,  
76 blood, or decomposition, which can be isolated from environmental samples (Thomsen &  
77 Willerslev, 2015). Studies using eDNA analysis to target specific semi-aquatic and terrestrial  
78 mammals have employed PCR or quantitative PCR (qPCR) (e.g. Franklin et al., 2019; Lugg,  
79 Griffiths, van Rooyen, Weeks, & Tingley, 2017; Rodgers & Mock, 2015; Thomsen et al., 2012;  
80 Williams, Huyvaert, Vercauteren, Davis, & Piaggio, 2018). eDNA metabarcoding can screen  
81 entire communities using PCR combined with high-throughput sequencing (Deiner et al., 2017;  
82 Thomsen & Willerslev, 2015), but mammalian assessments are uncommon (Klymus, Richter,  
83 Thompson, & Hinck, 2017; Kinoshita et al., 2019; Leempoel et al., 2019; Sales et al., 2019; Ushio  
84 et al., 2017). Tropical mammal assemblages have been obtained by metabarcoding invertebrate  
85 blood meals (e.g. Tessler et al., 2018) and salt licks (Ishige et al., 2017), but samples from the  
86 physical environment have tremendous potential to reveal mammal biodiversity over broad  
87 spatiotemporal scales (Sales et al., 2019; Ushio et al., 2017).

88 In aquatic ecosystems, eDNA metabarcoding has predominantly been applied to  
89 characterise fish (e.g. Evans et al., 2017; Hänfling et al., 2016; Lawson Handley et al., 2018;  
90 Valentini et al., 2016) and amphibian (e.g. Bálint et al., 2018; Valentini et al., 2016)  
91 communities. However, mammals also leave eDNA signatures in water that metabarcoding can  
92 detect (Harper et al., 2019; Klymus et al., 2017; Sales et al., 2019; Ushio et al., 2017). Ponds in  
93 particular provide drinking, foraging, dispersive, and reproductive opportunities for semi-  
94 aquatic and terrestrial mammals (Klymus et al., 2017). Samples from these waterbodies could  
95 uncover biodiversity present in the wider environment (Deiner et al., 2017; Harper et al., 2019).

96 Drinking is a major source of eDNA deposition due to the release of saliva, but mammals may  
97 also swim, wallow, urinate or defecate in water (Rodgers & Mock, 2015; Ushio et al., 2017;  
98 Williams et al., 2018). Furthermore, arboreal mammals may use ponds less than semi-aquatic  
99 and ground-dwelling species, non-territorial mammals may visit ponds less than territorial  
100 species, and group-living species may deposit more eDNA than solitary species (Williams et al.,  
101 2018). Despite evidence for eDNA deposition by semi-aquatic and terrestrial mammals in  
102 freshwater ecosystems, little is known about the influence of mammal behaviour on the  
103 distribution and strength of the eDNA signal left behind (defined here as proportional read  
104 counts).

105 In this study, we conducted two experiments under artificial and natural conditions to  
106 evaluate eDNA metabarcoding of pond water as a tool for monitoring semi-aquatic, ground-  
107 dwelling, and arboreal mammals of conservation or management concern. The first  
108 experiment, carried out on nine focal species housed at two wildlife parks, examined the role of  
109 sampling strategy, mammal lifestyle, and mammal behaviour on eDNA detection and signal  
110 strength under artificial conditions. Mammal eDNA detection is expected from enclosure water  
111 that is frequently used by individuals for drinking, swimming and bathing. We hypothesised  
112 that: (1) eDNA would be unevenly distributed, thus directed sampling would yield stronger  
113 eDNA signals (i.e. higher proportional read counts) for mammals than stratified sampling; (2)  
114 semi-aquatic mammals would have stronger eDNA signals than ground-dwelling or arboreal  
115 mammals; and (3) mammal behaviours involving water contact would generate stronger eDNA  
116 signals. The second experiment validated eDNA metabarcoding against camera trapping and  
117 field sign searches for mammal identification at natural ponds, and investigated spatiotemporal

118 variation in mammal eDNA signals. Mammal eDNA detection is unpredictable at natural  
119 waterbodies that can be extensive, subject to environmental fluctuations, and used rarely or  
120 not at all by individuals. We hypothesised that: (1) eDNA metabarcoding would detect more  
121 mammals than camera trapping or field signs; (2) semi-aquatic mammals would be readily  
122 detected and their eDNA evenly distributed in ponds in comparison to terrestrial mammals; and  
123 (3) temporal sampling would reveal that terrestrial mammal eDNA is detectable for short  
124 periods in comparison to fully aquatic vertebrates.

125

126

## 127 **2. Materials and methods**

128

### 129 **2.1 Study species**

130

131 We studied nine mammal species that are the focus of European conservation or management  
132 (Mathews et al., 2018): European water vole (*Arvicola amphibius*), European otter (*Lutra lutra*),  
133 Eurasian beaver (*Castor fiber*), European hedgehog (*Erinaceus europaeus*), European badger  
134 (*Meles meles*), red deer (*Cervus elaphus*), Eurasian lynx (*Lynx lynx*), red squirrel (*Sciurus*  
135 *vulgaris*), and European pine marten (*Martes martes*). Water vole, otter, red squirrel, pine  
136 marten and hedgehog are UK Biodiversity Action Plan species (Joint Nature Conservation  
137 Committee, 2018). Water vole, otter, and beaver are semi-aquatic, red squirrel and pine  
138 marten are arboreal, and the other species are ground-dwelling. Badger and red deer live in  
139 groups whereas the other species are predominantly solitary.

140

## 141 **2.2 Experiment 1: eDNA detection and signal strength in artificial systems**

142

143 Behavioural observation and eDNA sampling were conducted between 18<sup>th</sup> – 21<sup>st</sup> September  
144 2017 at Wildwood Trust (WT), Kent, England, and 10<sup>th</sup> – 11<sup>th</sup> October 2017 at Royal Zoological  
145 Society of Scotland (RZSS) Highland Wildlife Park (HWP), Kingussie, Scotland. Sixteen categories  
146 of behaviour were defined based on potential contact with waterbodies and species lifestyle,  
147 and the frequency and duration of behaviours recorded (Table 1, Appendix A: Table A1). The  
148 number of individuals in each enclosure was recorded alongside waterbody size (Table 2).  
149 Beaver, lynx, red deer, and red squirrel were present at both wildlife parks, whereas other  
150 captive species were only present at WT. Each species was observed for one hour on two  
151 separate occasions except nocturnal mammals (badger and beaver), which were observed  
152 overnight using camera traps (Bushnell Trophy Cam Standard, Bushnell Corporation, KS, USA).  
153 One camera trap per enclosure was positioned perpendicular to the ground (1 m height, 2 m  
154 from shoreline) to capture water and shoreline. Cameras took 30 s videos (1920 x 1080) when  
155 triggered (30 s interval between triggers) at high sensitivity. Behavioural observation was not  
156 undertaken for WT water voles as animals were under quarantine or HWP red squirrels as  
157 individuals were wild. Photos of waterbodies in animal enclosures are provided in Appendix B.

158 Water samples were collected from enclosures within 3 hrs of the second behavioural  
159 observation period. Up to six directed or stratified samples were collected, but sample number  
160 varied by species according to waterbody size and observed behaviours (Tables A1, A2).  
161 Enclosure drinking containers were also sampled and classed as ‘other’ samples. Bathing and



162 drinking bowls were sampled where enclosures contained no artificial waterbodies (WT water  
163 vole, red squirrel, and hedgehog). The HWP beaver enclosure was empty for 24 hrs before  
164 sampling. Water was sampled from a RZSS Edinburgh Zoo (EZ) enclosure containing beavers  
165 and classed as 'other'. A sample was collected from a water bath in the HWP woods to capture  
166 wild red squirrels and classed as 'other'.

167 Directed samples (2 L surface water taken approximately where behaviours were  
168 observed) were collected before stratified samples (2 L surface water [8 x 250 ml pooled  
169 subsamples] taken at equidistant points [access permitting] around the waterbody perimeter)  
170 to minimise disturbance to the water column and cross-contamination risk. Samples were  
171 collected using sterile Gosselin™ HDPE plastic bottles (Fisher Scientific UK Ltd, UK) and  
172 disposable gloves. A field blank (1 L molecular grade water [MGW]) was taken into each species  
173 enclosure, opened, and closed before artificial water sources were sampled. Samples ( $n = 80$ )  
174 collected from WT and HWP were transported alongside field blanks ( $n = 13$ ) in sterile  
175 coolboxes with ice packs to the University of Kent (UoK) and EZ respectively, where ice was  
176 added to coolboxes.

177 Samples and blanks were vacuum-filtered within 6 hrs of collection in a UoK wet  
178 laboratory and within 24 hrs of collection in an EZ staff room. Surfaces and equipment were  
179 sterilised before, during, and after set-up in temporary work areas. Surfaces and vacuum  
180 pumps were wiped with 10% v/v chlorine-based commercial bleach (Elliott Hygiene Ltd, UK)  
181 solution. Non-electrical equipment was immersed in 10% bleach solution for 10 minutes,  
182 followed by 5% v/v MicroSol detergent (Anachem, UK), and rinsed with purified water. Up to  
183 500 ml of each 2 L sample was vacuum-filtered through sterile 0.45 µm mixed cellulose ester

184 membrane filters with pads (47 mm diameter; Whatman, GE Healthcare, UK) using Nalgene™  
185 filtration units. One hour was allowed for each sample to filter and a second filter used if  
186 clogging occurred. A filtration blank (1 L MGW) was processed during each filtration round ( $n =$   
187 12), and equipment sterilised after each filtration round. After 500 ml had filtered or one hour  
188 had passed, filters were removed from pads using sterile tweezers, placed in sterile 47 mm  
189 petri dishes (Fisher Scientific UK Ltd, UK), sealed with parafilm (Sigma-Aldrich Company Ltd,  
190 UK), and stored at -20 °C. The total water volume filtered per sample was recorded for  
191 downstream analysis (Table A2; Fig. A1).

192

### 193 **2.3 Experiment 2: eDNA detection and signal strength in natural systems**

194

195 At three sites where focal species were present based on cumulative survey data, we selected  
196 two ponds (range 293-5056 m<sup>2</sup>, average 1471 m<sup>2</sup>) within 4 km of each other. The Bamff Estate  
197 (BE), Alyth, Scotland, was selected for beaver, otter, badger, red deer, and red squirrel, but roe  
198 deer (*Capreolus capreolus*) and red fox (*Vulpes vulpes*) were also present. Otter, water vole, and  
199 badger were present at Tophill Low Nature Reserve (TLNR), Driffield, East Yorkshire, alongside  
200 American mink (*Neovison vison*), stoat (*Mustela erminea*), weasel (*Mustela nivalis*), rabbit  
201 (*Oryctolagus cuniculus*), brown hare (*Lepus europaeus*), red fox, roe deer, and grey squirrel  
202 (*Sciurus carolinensis*). We selected Thorne Moors (TM), Doncaster, South Yorkshire, for red deer  
203 and badger, but stoat, weasel, red fox, roe deer, and Reeve's muntjac (*Muntiacus reevesi*) were  
204 also present. Camera traps (Bushnell Trophy Cam Standard/Aggressor, Bushnell Corporation,  
205 KS, USA) were deployed at TM (one per pond) and BE (three per pond) one week prior to eDNA

206 sampling and collected once sampling was completed. At TLNR, camera traps (two to three per  
207 pond) were deployed one day before a 5-day period of eDNA sampling and collected one week  
208 after sampling was completed. Camera traps were positioned perpendicular to the ground (1 m  
209 height, 0.3-1 m from shoreline) to capture water and shoreline. Cameras took three  
210 photographs (5 megapixel) when triggered (3 s interval between triggers) at high sensitivity.

211 Ten stratified samples were collected from the shoreline of each pond (TM: 17<sup>th</sup> April  
212 2018; BE: 20<sup>th</sup> April 2018; TLNR: 23<sup>rd</sup> – 27<sup>th</sup> April 2018) and a field blank (1 L MGW) included as  
213 in Experiment 1. TLNR ponds were sampled every 24 hrs over 5 days to investigate  
214 spatiotemporal variation in mammal eDNA signals. TM and TLNR samples were transported on  
215 ice in sterile coolboxes to the University of Hull (UoH) eDNA facility, and stored at 4 °C. BE  
216 samples were transported in sterile coolboxes with ice packs to BE accommodation. Surfaces  
217 and equipment were sterilised before, during, and after set-up as in Experiment 1. Samples ( $n =$   
218 140) and field blanks ( $n = 14$ ) were vacuum-filtered within 4 hrs of collection as in Experiment 1  
219 with minor modifications to maximise detection probability as follows. The full 2 L of each  
220 sample was vacuum-filtered where possible, two filters were used for each sample, and  
221 duplicate filters were stored in one petri dish at -20 °C. A filtration blank (1 L MGW) was  
222 processed during each filtration round ( $n = 21$ ). The total water volume filtered per sample was  
223 recorded (Table A3).

224

## 225 **2.4 DNA extraction**

226

227 DNA was extracted within 2 weeks of filtration at the UoH eDNA facility using the Mu-DNA  
228 water protocol (Sellers, Di Muri, Gómez, & Hänfling, 2018). The full protocol is available at:  
229 <https://doi.org/10.17504/protocols.io.qn9dvh6>. Duplicate filters from samples in Experiment 1  
230 were lysed independently and the lysate from each loaded onto one spin column. As more  
231 samples were collected in Experiment 2, duplicate filters were co-extracted by placing both in a  
232 single tube for bead milling. An extraction blank, consisting only of extraction buffers, was  
233 included for each round of DNA extraction ( $n = 17$ ). Eluted DNA (100  $\mu$ l) was stored at  $-20^{\circ}\text{C}$   
234 until PCR amplification.

235

## 236 **2.5 eDNA metabarcoding**

237

238 Our eDNA metabarcoding workflow is fully described in Appendix A. Briefly, we performed  
239 nested metabarcoding using a two-step PCR protocol, where Multiplex Identification (MID) tags  
240 were included in the first and second PCR for sample identification (Kitson et al., 2019). The first  
241 PCR amplified eDNA in triplicate with published 12S ribosomal RNA (rRNA) primers 12S-V5-F (5'-  
242 ACTGGGATTAGATACCCC-3') and 12S-V5-R (5'-TAGAACAGGCTCCTCTAG-3') (Riaz et al., 2011).  
243 Harper et al. (2018) validated these primers *in silico* for UK vertebrates, and found 91/112  
244 mammal species listed on the Natural History Museum Checklist of Mammalia v1 (subspecies  
245 excluded) could be distinguished. Nine indistinguishable species lacked reference sequences,  
246 whereas 12 had reference sequences but did not amplify. PCR positive controls (two per PCR

247 plate;  $n = 16$ ) were exotic cichlid (*Maylandia zebra*) DNA (0.05 ng/ $\mu$ L), and PCR negative controls  
248 (two per PCR plate;  $n = 16$ ) were MGW (Fisher Scientific UK Ltd, UK). PCR products were pooled  
249 to create sub-libraries (Fig. A2) and purified with Mag-BIND<sup>®</sup> RxnPure Plus magnetic beads  
250 (Omega Bio-tek Inc, GA, USA), following the double size selection protocol established by  
251 Bronner et al. (2009). Ratios of 0.9x and 0.15x magnetic beads to 100  $\mu$ L of each sub-library  
252 were used. Eluted DNA (30  $\mu$ L) was stored at -20 °C until the second PCR could be performed.  
253 The second PCR bound pre-adapters, MID tags, and Illumina adapters to the sub-libraries. PCR  
254 products were purified with Mag-BIND<sup>®</sup> RxnPure Plus magnetic beads (Omega Bio-tek Inc, GA,  
255 USA), following the double size selection protocol established by Bronner et al. (2009). Ratios of  
256 0.7x and 0.15x magnetic beads to 50  $\mu$ L of each sub-library were used. Eluted DNA (30  $\mu$ L) was  
257 stored at 4 °C until quantification and normalisation. The library was purified again, quantified  
258 by qPCR using the NEBNext<sup>®</sup> Library Quant Kit for Illumina<sup>®</sup> (New England Biolabs<sup>®</sup> Inc., MA,  
259 USA), and fragment size (330 bp) and removal of secondary product verified using an Agilent  
260 2200 TapeStation and High Sensitivity D1000 ScreenTape (Agilent Technologies, CA, USA). The  
261 library (220 eDNA samples, 27 field blanks, 33 filtration blanks, 17 extraction blanks, 16 PCR  
262 negative controls, and 16 PCR positive controls) was sequenced on an Illumina MiSeq<sup>®</sup> using a  
263 MiSeq Reagent Kit v3 (600-cycle) (Illumina, Inc, CA, USA). Raw sequence reads were  
264 demultiplexed using a custom Python script. metaBEAT v0.97.11 ([https://github.com/HullUni-](https://github.com/HullUni-bioinformatics/metaBEAT)  
265 [bioinformatics/metaBEAT](https://github.com/HullUni-bioinformatics/metaBEAT)) was used for quality trimming, merging, chimera removal, clustering,  
266 and taxonomic assignment of sequences against our UK vertebrate reference database (Harper  
267 et al., 2018) which contains sequences for 103 UK mammals. Taxonomic assignment used a  
268 lowest common ancestor approach based on the top 10% BLAST matches for any query that

269 matched a reference sequence across more than 80% of its length at minimum identity of 98%.

270

## 271 **2.6 Data analysis**

272

273 Analyses were performed in R v.3.4.3 (R Core Team, 2017). The total unrefined read counts (i.e.

274 raw taxonomically assigned reads) per sample were calculated and retained for downstream

275 analyses. Assignments were corrected: family and genera containing a single UK species were

276 reassigned to that species, species were reassigned to domestic subspecies, and

277 misassignments were corrected, e.g. *Lynx pardinus* and *Lynx lynx*. Manual reassignment

278 duplicated some metaBEAT assignments thus the read count data for these assignments were

279 merged. Taxon-specific sequence thresholds (i.e. maximum sequence frequency of each taxon

280 in PCR positive controls) were used to mitigate cross-contamination and false positives (Table

281 A4, Fig. A3), and remnant contaminants and higher taxonomic assignments removed excluding

282 the following genera. *Anas* (Dabbling ducks) was retained because potential for hybridisation

283 reduced confidence in species-level assignments, and *Emberiza* (Buntings) and *Larus* (White-

284 headed gulls) were retained because reference sequences were missing for several common

285 species. Dataset refinement is fully described in Appendix A. Taxonomic assignments remaining

286 in the refined dataset were predominantly of species resolution and considered true positives.

287 We split the refined dataset by Experiment 1 (artificial waterbodies) and Experiment 2 (natural

288 ponds). Proportional read counts for each species were calculated from the total unrefined

289 read counts per sample. Our proportional read count data were not normally distributed

290 (Shapiro–Wilk normality test:  $W = 0.915$ ,  $P < 0.001$ ), thus we used a Mann-Whitney  $U$  test to

291 compare the median proportional read count of stratified and directed samples across species.

292 We employed binomial Generalized Linear Mixed-effects Models (GLMMs) with the logit  
293 link function using the package glmmTMB (development version; Brooks et al., 2017) for the  
294 following tests. First, we compared the eDNA signals from stratified and directed samples for  
295 each mammal species using a hierarchical model including sample type nested within species  
296 (fixed) and wildlife park (random) as effects. We tested the influence of species lifestyle on  
297 mammal eDNA signals using a model with species lifestyle (fixed) and species nested within  
298 wildlife park (random) as effects. Using directed samples, we tested the influence of behaviour  
299 on mammal eDNA signals using two hierarchical models, including species nested within  
300 wildlife park (random) and specific (e.g. swimming, drinking) or generic (i.e. water contact  
301 versus no water contact) behaviour(s) respectively (fixed) as effects. We assessed model fit  
302 using diagnostic plots and performed validation checks to ensure model assumptions were met  
303 and overdispersion was absent (Zuur, Ieno, Walker, Saveliev, & Smith, 2009).

304 For Experiment 2, we qualitatively compared mammal presence-absence records  
305 generated by eDNA metabarcoding, camera trapping, and field signs. TLNR ponds were  
306 sampled every 24 hrs for 5 days, thus proportional read counts were averaged across days for  
307 comparison to BE and TM ponds (sampled once each). We qualitatively compared the  
308 distribution and persistence of eDNA signals between semi-aquatic and terrestrial mammals  
309 using tile plots and heat maps of the unaveraged proportional read counts for identified species  
310 at TLNR over the 5-day period. All figures were produced using the package ggplot2 v3.0.0  
311 (Wickham, 2016).

312

313

## 314 **3. Results**

315

### 316 **3.1 eDNA metabarcoding**

317

318 The sequencing run generated 47,713,656 raw sequence reads, of which 37,590,828 remained  
319 following trimming, merging, and length filter application. After removal of chimeras and  
320 redundancy via clustering, the library contained 21,127,061 sequences (average read count of  
321 64,215 per sample including controls), of which 16,787,750 (79.46%) were assigned a  
322 taxonomic rank. Contamination (Fig. A4) was observed in the field blanks (badger, beaver, lynx,  
323 pine marten, red squirrel, and water vole) as well as in the filtration and extraction blanks  
324 (human [*Homo sapiens*] and cichlid). PCR negative controls were contaminated to different  
325 extents with human, cichlid, beaver, and pine marten as well as non-focal species. After  
326 threshold application, contaminants remaining in eDNA samples included Gentoo penguin  
327 (*Pygoscelis papua*), reindeer (*Rangifer tarandus*), cichlid, and human. The refined dataset  
328 contained 59 vertebrate species, including six amphibians, 10 fish, 19 birds, and 24 mammals  
329 (Table A5).

330

### 331 **3.2 Experiment 1: eDNA detection and signal strength in artificial systems**

332

333 All nine focal species were detected in captivity, of which seven were detected in all water



334 samples taken from their respective enclosures. HWP red deer were not detected in 2 of 5  
335 stratified samples, and WT hedgehog was not detected in 1 of 2 drinking bowl samples (Fig. 1).  
336 'Other' samples (neither directed nor stratified) were excluded from further comparisons, thus  
337 hedgehog, red squirrel, and water vole were omitted in downstream analyses. Across species,  
338 stratified samples (0.406) had a higher median proportional read count than directed samples  
339 (0.373), but this difference was not significant (Mann-Whitney  $U$  test:  $U = 1181.5$ ,  $P = 0.829$ ).  
340 Proportional read counts for directed and stratified samples did not significantly differ ( $\chi^2_6 =$   
341  $0.364$ ,  $P = 0.999$ ) within species either (Fig. 2a; GLMM:  $\theta = 0.168$ ,  $\chi^2_{53} = 8.915$ ,  $P = 1.000$ ,  
342 pseudo- $R^2 = 39.21\%$ ). Otter proportional read counts were lower than other species, but not  
343 significantly so. Similarly, species lifestyle (semi-aquatic, ground-dwelling, arboreal) did not  
344 influence ( $\chi^2_2 = 0.655$ ,  $P = 0.721$ ) proportional read counts (Fig. 2b; GLMM:  $\theta = 0.213$ ,  $\chi^2_{61} =$   
345  $13.002$ ,  $P = 1.000$ , pseudo- $R^2 = 11.85\%$ ). Proportional read counts did not differ ( $\chi^2_{11} = 1.369$ ,  $P$   
346  $= 0.999$ ) according to specific behaviours exhibited by species (Fig. 3a; GLMM:  $\theta = 0.355$ ,  $\chi^2_{31} =$   
347  $11.013$ ,  $P = 0.999$ , pseudo- $R^2 = 9.17\%$ ). Likewise, generic behaviour (i.e. water contact versus no  
348 water contact) did not influence ( $\chi^2_{11} = 0.002$ ,  $P = 0.964$ ) proportional read counts (Fig. 3b;  
349 GLMM:  $\theta = 0.217$ ,  $\chi^2_{41} = 8.897$ ,  $P = 1.000$ , pseudo- $R^2 = 8.50\%$ ).

350

### 351 **3.3 Experiment 2: eDNA detection and signal strength in natural systems**

352

353 At natural ponds, eDNA metabarcoding, camera trapping, and field signs all detected beaver,  
354 red deer, and roe deer. Camera traps (Fig. 4) and field signs recorded red fox and badger when  
355 eDNA metabarcoding did not (Fig. 5). However, eDNA metabarcoding revealed small mammals

356 missed by cameras and field signs, including water vole, water shrew (*Neomys fodiens*), bank  
357 vole (*Myodes glareolus*), common shrew (*Sorex araneus*), brown rat (*Rattus norvegicus*), rabbit,  
358 grey squirrel, and common pipistrelle (*Pipistrellus pipistrellus*). We observed mice or vole  
359 footprints at BE Pond 1, but could not ascertain species. Fig. 5 summarises mammals recorded  
360 by different methods at each site with reference to cumulative survey data. Notably, only  
361 beaver was found at the same ponds by all methods. Although methods shared species at site  
362 level, species were not always detected at the same pond. Detection rates for species captured  
363 by at least one survey method are summarised in Table A6.

364         Sampling of natural ponds revealed spatial patterns in eDNA detection and signal  
365 strength. eDNA from non-domestic terrestrial mammals (i.e. mammals excluding dog [*Canis*  
366 *lupus familiaris*], pig [*Sus scrofa domesticus*], sheep [*Ovis aries*] and cow [*Bos taurus*]) was  
367 unevenly dispersed compared with semi-aquatic mammals (Fig. A5). Semi-aquatic beaver and  
368 water vole were detected in at least 90% and 60% respectively of water samples ( $n = 10$ )  
369 collected from single ponds, albeit water shrew was only detected in 10% of samples. Non-  
370 domestic terrestrial mammals were routinely detected in <20% of water samples collected from  
371 a pond and left relatively weak eDNA signals. Overall, beaver was the most consistently  
372 detected mammal with the highest proportional read counts. However, the strongest and most  
373 evenly distributed signals belonged to amphibians, particularly common frog (*Rana temporaria*)  
374 and great crested newt (*Triturus cristatus*) (Fig. A5).

375         TLNR samples collected over a 5-day period (D01-05) revealed that mammal detection  
376 heavily depends on the spatial and temporal resolution of eDNA metabarcoding surveys (Fig.  
377 A6). Mammal eDNA signals in pond water were ephemeral, often disappearing within 24-48 hrs

378 of initial detection, as opposed to amphibians that were detected for multiple days and whose  
379 eDNA signal increased in strength. The majority of semi-aquatic or terrestrial mammals were  
380 only detected in a single sample on each day.

381

382

## 383 **4. Discussion**

384

385 We have demonstrated the potential of eDNA metabarcoding for monitoring conservation and  
386 management priority mammals, but species detection rates are variable. Our experiments have  
387 validated this molecular approach and provided new insights that will inform the development  
388 and application of mammal eDNA metabarcoding. Sampling strategy, mammal lifestyle, and  
389 mammal behaviour did not influence eDNA detection and signal strength in captivity, but all  
390 played vital roles in natural ponds. Although semi-aquatic and terrestrial mammals were  
391 detected from pond water, their eDNA signals were temporary and weak in comparison to  
392 aquatic amphibians and fishes. Nonetheless, this suggests that eDNA is representative of  
393 contemporary and local mammal diversity.

394

### 395 **4.1 Influence of sampling strategy and mammal behaviour on eDNA detection**

396

397 In Experiment 1, all nine focal species were detected in captivity, and seven were detected in all  
398 water samples taken from their respective enclosures. This demonstrates that our method can  
399 successfully detect a variety of mammals from pond and drinking water. Surprisingly, we found

400 that neither sampling strategy nor mammal lifestyle nor mammal behaviour influenced eDNA  
401 detectability and signal strength in captivity. This included behaviours associated with eDNA  
402 deposition, e.g. swimming, drinking, urination, and defecation (Rodgers & Mock, 2015; Ushio et  
403 al., 2017; Williams et al., 2018). Enclosures were permanently occupied and artificial  
404 waterbodies likely saturated with eDNA, which possibly masked behavioural signals. Modest  
405 replication may have limited experimental power, preventing patterns being detected  
406 statistically. Nonetheless, our results show that mammal contact with water enables eDNA  
407 deposition and detection.

408         Unsurprisingly, given the nature of wild mammal interactions with natural systems  
409 versus those in captivity, Experiment 2 results highlight the challenges of mammal eDNA  
410 detection. We recorded 17 mammals using three monitoring tools, comparable to the 17  
411 mammals expected from cumulative survey data despite discordance. Field signs and camera  
412 trapping detected red fox and badger where eDNA metabarcoding did not, but eDNA  
413 metabarcoding identified water vole and other small mammals missed on camera or with  
414 ambiguous field signs, i.e. mice, voles, shrews. Importantly, camera trap deployment period,  
415 height, and positioning may have influenced small mammal detection by this method  
416 (Caravaggi et al., 2018). Ishige et al. (2017) achieved comparable mammal detection at salt licks  
417 with eDNA metabarcoding and camera trapping, but species presence was inconsistent  
418 between salt licks surveyed. Using multi-species occupancy modelling for three mammal  
419 species, Sales et al. (2019) observed water-based eDNA metabarcoding provided comparable  
420 detection probabilities to conventional survey methods and actually outperformed camera  
421 trapping. Similarly, Leempoel et al. (2019) found soil-based eDNA metabarcoding identified the

422 same mammals as camera trapping as well as small mammals rarely seen on camera, albeit the  
423 methods differed between sites. Our own results echo all three studies, where despite some  
424 inconsistencies, eDNA metabarcoding enhanced species inventories and identified smaller,  
425 cryptic taxa.

426 Notably, no survey method captured semi-aquatic otter despite presence at study sites  
427 and successful detection in eDNA metabarcoding studies of UK ponds (Harper et al., 2019),  
428 lakes (Hänfling et al., 2017), and rivers/streams (Sales et al., 2019). Captive otter also had a  
429 weaker eDNA signal than other semi-aquatic mammals studied here. Lower eDNA detection  
430 rates for otter, badger, and red fox may stem from species' ecologies (Sales et al., 2019). These  
431 mammals are wide-ranging (Gaughran et al., 2018; Thomsen et al., 2012) and may not readily  
432 release DNA in water. Otters often spraint on grass or rock substrata outside water and use  
433 latrines associated with caves and dens (Ruiz-Olmo & Gosálbez, 1997). As terrestrial mammals,  
434 red fox and badger must drink from or enter ponds for eDNA deposition to occur (Rodgers &  
435 Mock, 2015; Ushio et al., 2017; Williams et al., 2018). Otter, badger, and red fox detection may  
436 require greater spatiotemporal resolution of eDNA sampling. This is reinforced by other eDNA  
437 metabarcoding studies where mammal detection was highly variable across sites surveyed  
438 (Ishige et al., 2017; Klymus et al., 2017; Leempoel et al., 2019; Sales et al., 2019; Ushio et al.,  
439 2017). False negatives may instead be symptomatic of metabarcoding bias, but this is unlikely in  
440 our study (section 4.2).

441 eDNA from other semi-aquatic mammals was evenly distributed, being found in most or  
442 all samples collected on fine spatial scales within natural ponds, whereas terrestrial mammal  
443 eDNA was highly localised and detected in few (<20%) samples. Mammal eDNA signals varied

444 temporally, being detectable for two consecutive days maximum. Depending on the species,  
445 mammal eDNA may be spatially and temporally clumped in lentic ecosystems due to the nature  
446 and frequency of water contact. Unless non-domestic mammals exhibit behaviours involving  
447 prolonged water contact (e.g. swimming, wallowing), they may only be detected at drinking  
448 sites (Klymus et al., 2017; Ushio et al., 2017; Williams et al., 2018). Conversely, domestic  
449 mammals may have elevated detection rates in ponds due to high occurrence of these  
450 waterbodies in agricultural landscapes as well as eDNA transport by rainfall and run-off (Staley  
451 et al., 2018). eDNA detection and persistence are further influenced by group size, where eDNA  
452 from multiple individuals endures for longer periods in water than eDNA from single individuals  
453 (Williams et al., 2018). Detailed investigations incorporating biotic (e.g. population size, body  
454 mass, behaviour) and abiotic (e.g. temperature, pH, rainfall) factors are needed to understand  
455 the longevity of mammal eDNA signals in aquatic ecosystems (Rodgers & Mock, 2015; Sales et  
456 al., 2019; Williams et al., 2018).

457         Our two experiments have shown that sampling strategy influences mammal eDNA  
458 detection. Mammal eDNA was evenly distributed in closed, artificial waterbodies, but locally  
459 distributed in open, natural ponds. Captive mammal enclosures contained one species  
460 (excluding HWP red deer) and a drinking container(s) and/or small waterbody (range 0.01-162  
461 m<sup>2</sup>, mean 27.4 m<sup>2</sup>). Some enclosures housed more individuals of a species than others, thereby  
462 increasing eDNA deposition and detection probability (Williams et al., 2018). Wild mammals  
463 have an array of freshwater habitats at their disposal and can hold vast territories. Therefore,  
464 rates of pond visitation and eDNA deposition are more irregular (Klymus et al., 2017; Ushio et  
465 al., 2017), possibly leading to between-sample variation (Williams et al., 2018).

466

## 467 **4.2 Accounting for false positives and false negatives in metabarcoding**

468

469 eDNA metabarcoding has potential for inclusion in mammal monitoring schemes (section 4.3),  
470 but like existing monitoring tools, may produce false negatives or false positives. Our process  
471 controls identified low-level contamination at all stages of metabarcoding, but primarily during  
472 sampling or PCR (Appendix A). We applied taxon-specific sequence thresholds to our data to  
473 mitigate false positives as in Harper et al. (2019). Remnant contaminants were cichlid  
474 (laboratory), Gentoo penguin (environment), reindeer (environment), and human  
475 (environment/laboratory). Gentoo penguin is housed at EZ and was identified from EZ beaver  
476 enclosure water. The WT red squirrel and reindeer enclosures are in close proximity. DNA  
477 transport by wildlife (e.g. waterfowl [Hänfling et al., 2016]) and park staff/visitors may explain  
478 this environmental contamination. Human DNA was present across process controls  
479 corresponding to artificial and natural waterbodies. Human DNA may be amplified and  
480 sequenced instead of focal species, potentially resulting in false negative detections for rare  
481 and/or less abundant species. Human DNA blocking primers can prevent this bias, but may  
482 impair PCR amplification efficiency (Klymus et al., 2017; Ushio et al., 2017; Valentini et al.,  
483 2016). Sequence thresholds are one method of accounting for contamination in metabarcoding  
484 datasets, but this is a topic that warrants deeper investigation aimed at researching and  
485 refining standardised methods for false positive identification and mitigation, e.g. the R  
486 package microDecon (McKnight et al., 2019).

487 In our study, eDNA metabarcoding produced false negatives for otter, badger, and red

488 fox at natural ponds. We selected a 12S metabarcode designed to amplify vertebrate DNA (Riaz  
489 et al., 2011). One of four fox reference sequences (NCBI Accession: KF387633.1) possessed one  
490 mismatch to the forward primer, and one of three otter reference sequences (NCBI Accession:  
491 EF672696.1) possessed one mismatch to the reverse primer. These mismatches did not occur  
492 within the first or last four bases of either primer sequence, and there were no primer  
493 mismatches with the badger reference sequences (Harper et al., 2018). Therefore, amplification  
494 bias was not responsible for these false negatives. DNA from aquatic and more abundant  
495 species may have overwhelmed otter, badger, and red fox DNA during amplification and  
496 sequencing, i.e. species-masking (Kelly, Port, Yamahara, & Crowder, 2014; Klymus et al., 2017).  
497 Species-masking may also arise from use of proportional read counts as an index of eDNA signal  
498 strength. High proportional read counts for a species may translate to a weak eDNA signal if the  
499 total mammalian eDNA concentration is highly variable between samples or lower than the  
500 total eDNA concentration for other taxonomic groups in a sample. Metabarcoding primers  
501 targeting mammals (Ushio et al., 2017) or multi-marker (e.g. 12S, 16S, COI) investigations  
502 (Evans et al., 2017; Hänfling et al., 2016; Kelly et al., 2014; Klymus et al., 2017) may improve  
503 mammal detection in systems with competition from non-target aquatic species and where  
504 total mammalian eDNA concentration varies between samples. Similarly, more biological and  
505 technical replication may improve species detection probabilities (Evans et al., 2017; Lawson  
506 Handley et al., 2019; Sales et al., 2019; Valentini et al., 2016). Importantly, otter also had lower  
507 qPCR detection than amphibians and fish (Thomsen et al., 2012). A metabarcoding and qPCR  
508 comparison (e.g. Harper et al., 2018; Lacoursière-Roussel, Dubois, Normandeau, & Bernatchez,  
509 2016) would confirm whether poor amplification efficiency for otter arises from technical bias



510 or species ecology, and whether eDNA metabarcoding can reliably monitor otter alongside the  
511 wider mammalian community.

512

### 513 **4.3 Scope of eDNA metabarcoding for mammal monitoring**

514

515 Mammal population assessments are hindered by lack of data and systematic monitoring for  
516 many species (Mathews et al., 2018). Distribution and occupancy data are poor for most  
517 species, with ongoing survey effort biased toward rare species. Surveys heavily rely on citizen  
518 science and casual records (Massimino et al., 2018). Tools that provide standardised, systematic  
519 monitoring of mammal populations are needed (Mathews et al., 2018). Despite issues inherent  
520 to metabarcoding for biodiversity monitoring (Deiner et al., 2017), this tool has enormous  
521 potential to enhance mammal monitoring, conservation, and management. eDNA  
522 metabarcoding generates distribution data for multiple species, whether rare, invasive, or  
523 abundant, and could track conflicting species simultaneously, e.g. water vole, American mink,  
524 and otter (Bonesi & Macdonald, 2004) or red squirrel, grey squirrel, and pine marten (Sheehy,  
525 Sutherland, O'Reilly, & Lambin, 2018).

526 eDNA metabarcoding can rapidly survey multitudes of aquatic sites at landscape-scale  
527 where camera traps might be resource-intensive, cost-inefficient, and susceptible to  
528 theft/damage (Ushio et al., 2017). Field signs require volunteer time and skill (Sadlier et al.,  
529 2004) to be employed at comparable spatial scales to eDNA metabarcoding which could  
530 provide accurate data for species misidentified from field signs, e.g. mice and voles, otter and  
531 mink (Franklin et al., 2019; Harris & Yalden, 2004). However, camera traps and field signs both

532 recorded species that eDNA metabarcoding missed. Therefore, eDNA metabarcoding is  
533 complementary and should be incorporated into, not replace, existing monitoring schemes  
534 (Leempoel et al., 2019; Sales et al., 2019). This tool could be most effective in mammal  
535 monitoring if deployed at the edges of known species distributions, in areas where species  
536 presence is unknown, and in areas with isolated species records (Mathews et al., 2018).

537

#### 538 **4.4 Recommendations for mammal survey using eDNA metabarcoding**

539

540 Water-based eDNA metabarcoding shows great promise for mammal monitoring encompassing  
541 conservation and management priority species (Sales et al., 2019). However, there are factors  
542 to be considered when designing and conducting mammal eDNA surveys that may not be  
543 problematic for surveys of fishes or amphibians. Mammal eDNA detection probabilities from  
544 natural ponds will likely be high when areas with dense populations are studied, but rigorous  
545 sampling strategies will be required to track mammals in areas sparsely populated by  
546 individuals. Multiple ponds must be sampled repeatedly, and samples taken at multiple  
547 locations within ponds without pooling to enable site occupancy inferences. Importantly, we  
548 sampled natural ponds in spring but sampling in other seasons may produce different results,  
549 reflective of species' ecologies (Lawson Handley et al., 2019). To account for differential  
550 mammal visitation rates and maximise eDNA detection probabilities, we recommend that  
551 researchers and practitioners using eDNA metabarcoding for mammal monitoring channel their  
552 efforts into extensive sampling of numerous waterbodies in a given area over prolonged  
553 timescales. Water-based eDNA appears to be indicative of contemporary mammal presence,

554 with most mammal eDNA signals lost within 1-2 days. Therefore, eDNA metabarcoding could  
555 provide valuable mammalian community “snapshots” that may not be obtained with other  
556 survey methods (Ushio et al., 2017). Different sample types (e.g. water, soil, snow, salt licks,  
557 feeding traces, faeces, hair, and blood meals) may also offer new insights to mammal  
558 biodiversity (Franklin et al., 2019; Ishige et al., 2017; Kinoshita et al., 2019; Leempoel et al.,  
559 2019; Sales et al., 2019; Tessler et al., 2018; Ushio et al., 2017).

560

561

## 562 **Data accessibility**

563

564 Raw sequence reads have been archived on the NCBI Sequence Read Archive (Study:  
565 SRP164740; BioProject: PRJNA495011; BioSamples: SAMN10195928 - SAMN10196255; SRA  
566 accessions: SRR7986451 - SRR7986778). Jupyter notebooks, R scripts and corresponding data  
567 are archived online (<https://doi.org/10.5281/zenodo.2561415>).

568

569

## 570 **Acknowledgements**

571

572 The authors declare that they have no conflicts of interest in presenting this work for  
573 publication. This work was funded by the University of Hull, and D.S.R was supported by the  
574 Natural Environment Research Council award number NE/R016429/1 as part of the UK-SCAPE

575 programme delivering National Capability. We would like to thank Gill Murray-Dickson  
576 (National Museums Scotland) and Helen Senn (RZSS Edinburgh Zoo) for feedback on the study  
577 design, and Richard Griffiths (DICE, University of Kent) for support with filtration of water  
578 samples from Wildwood Trust. We are grateful to staff at Wildwood Trust and RZSS Highland  
579 Wildlife Park for assisting with eDNA sampling from animal enclosures. We thank Richard  
580 Hampshire and volunteers at Tophill Low Nature Reserve for assisting with camera trap  
581 deployment. Tim Kohler (Natural England) and Paul Ramsay kindly gave permission to sample at  
582 Thorne Moors and the Bamff Estate respectively.

583

584

## 585 **Author contributions**

586

587 L.R.H, B.H, and L.L.H conceived and designed the study. A.I.C and M.G coordinated sampling at  
588 Wildwood Trust and RZSS Highland Wildlife Park respectively. L.R.H, C.D.M, C.J.M, and T.L  
589 collected and filtered water samples. A.L, T.L, and T.B helped select natural ponds to be  
590 surveyed using eDNA, camera trapping, and field signs, and provided camera traps for the  
591 study. L.R.H, A.L, and T.L deployed camera traps, which were then collected and footage  
592 analysed by L.R.H. L.R.H processed samples in the laboratory with advice from C.D.M and A.M.  
593 D.S.R sequenced the final library. L.R.H completed bioinformatic processing of samples, and  
594 subsequent data analysis. L.R.H wrote the manuscript, which all authors contributed critically to  
595 drafts of and gave final approval for publication.

596

## 597 References

598

599 Alberdi, A., Aizpurua, O., Gilbert, M. T. P., & Bohmann, K. (2018) Scrutinizing key steps for  
600 reliable metabarcoding of environmental samples. *Methods in Ecology and Evolution*, *9*,  
601 134–147.

602 Bálint, M., Nowak, C., Márton, O., Pauls, S. U., Wittwer, C., Aramayo, J. L., Schulze, A.,  
603 Chambert, T., Cocchiararo, B., & Jansen, M. (2018). Accuracy, limitations and cost efficiency  
604 of eDNA-based community survey in tropical frogs. *Molecular Ecology Resources*, *18*, 1415–  
605 1426. <https://doi.org/10.1111/1755-0998.12934>

606 Bland, L. M., Collen, B., Orme, C. D. L., & Bielby, J. (2015). Predicting the conservation status of  
607 data-deficient species: Predicting Extinction Risk. *Conservation Biology*, *29*, 250–259.  
608 <https://doi.org/10.1111/cobi12372>

609 Bonesi, L., & Macdonald, D. W. (2004). Differential habitat use promotes sustainable  
610 coexistence between the specialist otter and the generalist mink. *Oikos*, *106*, 509–  
611 519. <https://doi.org/10.1111/j.0030-1299.2004.13034.x>

612 Bronner, I. F., Quail, M. A., Turner, D. J. & Swerdlow, H. (2009) Improved Protocols for Illumina  
613 Sequencing. *Current Protocols in Human Genetics*, *18*, 18.2.1–18.2.42.

614 Brooks, M. E., Kristensen, K., van Benthem, K. J., Magnusson, A., Berg, C. W., Nielsen, A., Skaug,  
615 H. J., Machler, M., & Bolker, B. M. (2017). glmmTMB Balances Speed and Flexibility Among  
616 Packages for Zero-inflated Generalized Linear Mixed Modeling. *The R Journal*, *9*, 378–400.  
617 <https://doi.org/10.32614/RJ-2017-066>

618 Burton, A. C., Neilson, E., Moreira, D., Ladle, A., Steenweg, R., Fisher, J. T., Bayne, E., & Boutin,  
619 S. (2015). REVIEW: Wildlife camera trapping: a review and recommendations for linking  
620 surveys to ecological processes. *Journal of Applied Ecology*, *52*, 675–  
621 685. <https://doi.org/10.1111/1365-2664.12432>

622 Caravaggi, A., Gatta, M., Vallely, M. -C., Hogg, K., Freeman, M., Fadaei, E., Dick, J. T. A.,  
623 Montgomery, W. I., Reid, N., & Tosh, D. G. (2018). Seasonal and predator-prey effects on  
624 circadian activity of free-ranging mammals revealed by camera traps. *PeerJ*, *6*, e5827.  
625 <https://doi.org/10.7717/peerj.5827>

626 Deiner, K., Bik, H. M., Mächler, E., Seymour, M., Lacoursière-Roussel, A., Altermatt, F., Creer, S.,  
627 Bista, I., Lodge, D. M., de Vere, N., Pfrender, M. E., & Bernatchez, L. (2017). Environmental  
628 DNA metabarcoding: transforming how we survey animal and plant communities. *Molecular*  
629 *Ecology*, *26*, 5872–5895. <https://doi.org/10.1111/mec.14350>

630 Evans, N. T., Li, Y., Renshaw, M. A., Olds, B. P., Deiner, K., Turner, C. R., Jerde, C. L., Lodge, D. M.,  
631 Lamberti, G. A., & Pfrender, M. E. (2017). Fish community assessment with eDNA  
632 metabarcoding: effects of sampling design and bioinformatic filtering. *Canadian Journal of*  
633 *Fisheries and Aquatic Sciences*, *74*, 1362–1374. <https://doi.org/10.1139/cjfas-2016-0306>

- 634 Franklin, T. W., McKelvey, K. S., Golding, J. D., Mason, D. H., Dysthe, J. C., Pilgrim, K. L., Squires,  
635 J. R., Aubry, K. B., Long, R. A., Greaves, S. E., Raley, C. M., Jackson, S., MacKay, P., Lisbon, J.,  
636 Sauder, J. D., Pruss, M. T., Heffington, D., & Schwartz, M. K (2019). Using environmental DNA  
637 methods to improve winter surveys for rare carnivores: DNA from snow and improved  
638 noninvasive techniques. *Biological Conservation*, 229, 50–58.  
639 <https://doi.org/10.1016/j.biocon.2018.11.006>
- 640 Gaughran, A., Kelly, D. J., MacWhite, T., Mullen, E., Maher, P., Good, M., & Marples, N. M.  
641 (2018). Super-ranging. A new ranging strategy in European badgers. *PLoS ONE*, 13,  
642 e0191818. <https://doi.org/10.1371/journal.pone.0191818>
- 643 Hänfling, B., Lawson Handley, L., Read, D. S., Hahn, C., Li, J., Nichols, P., Blackman, R. C., Oliver,  
644 A., & Winfield, I. J. (2016). Environmental DNA metabarcoding of lake fish communities  
645 reflects long-term data from established survey methods. *Molecular Ecology*, 25, 3101–3119.  
646 <https://doi.org/10.1111/mec.13660>
- 647 Hänfling, B., Lawson Handley, L., Lunt, D., Shum, P., Winfield, I., & Read, D. S. (2017). *A Review*  
648 *of Recent Advances in Genetic Methods to Identify Improvements in CAMERAS Partners*  
649 *Monitoring Activities*. University of Hull, Hull, UK.
- 650 Harper, L. R., Lawson Handley, L., Hahn, C., Boonham, N., Rees, H. C., Gough, K. C., Lewis, E.,  
651 Adams, I. P., Brotherton, P., Phillips, S., & Hänfling, B. (2018). Needle in a haystack? A  
652 comparison of eDNA metabarcoding and targeted qPCR for detection of the great crested  
653 newt (*Triturus cristatus*). *Ecology and Evolution*, 8, 6330–6441.  
654 <https://doi.org/10.1002/ece3.4013>
- 655 Harper, L. R., Lawson Handley, L., Hahn, C., Boonham, N., Rees, H. C., Lewis, E., Adams, I. P.,  
656 Brotherton, P., Phillips, S., & Hänfling, B. (2019) Testing ecological hypotheses at the  
657 pondscape with environmental DNA metabarcoding: a case study on a threatened  
658 amphibian. *bioRxiv*, 278309. <https://doi.org/10.1101/278309>
- 659 Harris, S., & Yalden, D. W. (2004). An integrated monitoring programme for terrestrial mammals  
660 in Britain. *Mammal Review*, 34, 157–167. <https://doi.org/10.1046/j.0305-1838.2003.00030.x>
- 661 Ishige, T., Miya, M., Ushio, M., Sado, T., Ushioda, M., Maebashi, K., Yonechi, R., Lagan, P., &  
662 Matsubayashi, H. (2017). Tropical-forest mammals as detected by environmental DNA at  
663 natural saltlicks in Borneo. *Biological Conservation*, 210, 281–285.  
664 <https://doi.org/10.1016/j.biocon.2017.04.023>
- 665 Joint Nature Conservation Committee (2018) UK BAP priority terrestrial mammal species.  
666 Accessed on 1<sup>st</sup> December 2018. <http://jncc.defra.gov.uk/page-5170>
- 667 Kelly, R. P., Port, J. A., Yamahara, K. M., & Crowder, L. B. (2014). Using environmental DNA to  
668 census marine fishes in a large mesocosm. *PLoS ONE*, 9, e86175.  
669 <https://doi.org/10.1371/journal.pone.0086175>

- 670 Kinoshita, G., Yonezawa, S., Murakami, S., & Isagi, Y. (2019) Environmental DNA Collected from  
671 Snow Tracks is Useful for Identification of Mammalian Species. *Zoological Science*, 36, 198–  
672 207. <http://dx.doi.org/10.2108/zs180172>
- 673 Kitson, J. J. N., Hahn, C., Sands, R. J., Straw, N. A., Evans, D. M., & Lunt, D. H. (2019). Detecting  
674 host-parasitoid interactions in an invasive Lepidopteran using nested tagging DNA-  
675 metabarcoding. *Molecular Ecology*, 28, 471–483. <https://doi.org/10.1111/mec.14518>
- 676 Klymus, K. E., Richter, C. A., Thompson, N., & Hinck, J. E. (2017). Metabarcoding of  
677 Environmental DNA Samples to Explore the Use of Uranium Mine Containment Ponds as a  
678 Water Source for Wildlife. *Diversity*, 9, 54. <https://doi.org/10.3390/d9040054>
- 679 Lacoursière-Roussel, A., Dubois, Y., Normandeau, E., & Bernatchez, L. (2016). Improving  
680 herpetological surveys in eastern North America using the environmental DNA method.  
681 *Genome*, 59, 991–1007. <https://doi.org/10.1139/gen-2015-0218>
- 682 Lawson Handley, L., Read, D.S., Winfield, I.J., Kimbell, H., Johnson, H., Li, J., Hahn, C., Blackman,  
683 R., Wilcox, R., Donnelly, R., Szitenberg, A., & Hänfling, B. (2019) Temporal and spatial  
684 variation in distribution of fish environmental DNA in England’s largest lake. *Environmental*  
685 *DNA*, 12, e0176343. <https://doi.org/10.1002/edn3.5>
- 686 Leempoel, K., Hebert, T., & Hadly, E. A. (2019) A comparison of eDNA to camera trapping for  
687 assessment of terrestrial mammal diversity. *bioRxiv*, 634022.  
688 <https://doi.org/10.1101/634022>
- 689 Lugg, W. H., Griffiths, J., van Rooyen, A. R., Weeks, A. R., & Tingley, R. (2017). Optimal survey  
690 designs for environmental DNA sampling. *Methods in Ecology and Evolution*, 9, 1049–1059.  
691 <https://doi.org/10.1111/2041-210X.12951>
- 692 Massimino, D., Harris, S. J., & Gillings, S. (2018). Evaluating spatiotemporal trends in terrestrial  
693 mammal abundance using data collected during bird surveys. *Biological Conservation*, 226,  
694 153–167. <https://doi.org/10.1016/j.biocon.2018.07.026>
- 695 Mathews, F., Kubasiewicz, L. M., Gurnell, J., Harrower, C. A., McDonald, R. A., & Shore, R. F.  
696 (2018) *A Review of the Population and Conservation Status of British Mammals: Technical*  
697 *Summary*. Natural England, Peterborough.
- 698 McKnight, D. T., Huerlimann, R., Bower, D. S., Schwarzkopf, L., Alford, R. A., & Zenger, K. R.  
699 (2019) microDecon: A highly accurate read-subtraction tool for the post-sequencing removal  
700 of contamination in metabarcoding studies. *Environmental DNA*, 1, 14–25.  
701 <https://doi.org/10.1002/edn3.11>
- 702 Riaz, T., Shehzad, W., Viari, A., Pompanon, F., Taberlet, P., & Coissac, E. (2011). ecoPrimers:  
703 inference of new DNA barcode markers from whole genome sequence analysis. *Nucleic Acids*  
704 *Research*, 39, e145. <https://doi.org/10.1093/nar/gkr732>
- 705 Rodgers, T. W., & Mock, K. E. (2015). Drinking water as a source of environmental DNA for the  
706 detection of terrestrial wildlife species. *Conservation Genetics Resources*, 7, 693–696.  
707 <https://doi.org/10.1007/s12686-015-0478-7>

- 708 Ruiz-Olmo, J., & Gosálbez, J. (1997). Observations on the sprinting behaviour of the otter *Lutra*  
709 *lutra* in the NE Spain. *Acta Theriologica*, 42, 259–270.
- 710 Sadlier, L. M. J., Webbon, C. C., Baker, P. J., & Harris, S. (2004). Methods of monitoring red foxes  
711 *Vulpes vulpes* and badgers *Meles meles*: are field signs the answer? *Mammal Review*, 34,  
712 75–98. <https://doi.org/10.1046/j.0305-1838.2003.00029.x>
- 713 Sales, N. G., McKenzie, M. B., Drake, J., Harper, L. R., Browett, S. S., Coscia, I., Wangenstein, O.  
714 S., Baillie, C., Bryce, E., Dawson, D. A., Ochu, E., Hänfling, B., Lawson Handley, L., Mariani, S.,  
715 Lambin, X., Sutherland, C., & McDevitt, A. D. (2019) Fishing for mammals: landscape-level  
716 monitoring of terrestrial and semi-aquatic communities using eDNA from lotic ecosystems.  
717 *bioRxiv*, 629758. <https://doi.org/10.1101/629758>
- 718 Sellers, G. S., Di Muri, C., Gómez, A., & Hänfling, B. (2018). Mu-DNA: a modular universal DNA  
719 extraction method adaptable for a wide range of sample types. *Metabarcoding and*  
720 *Metagenomics*, 2, e24556. <https://doi.org/10.3897/mbmg.2.24556>
- 721 Sheehy, E., Sutherland, C., O'Reilly, C., & Lambin, X. (2018) The enemy of my enemy is my  
722 friend: native pine marten recovery reverses the decline of the red squirrel by suppressing  
723 grey squirrel populations. *Proceedings of the Royal Society of London B*, 285, 20172603.  
724 <https://doi.org/10.1098/rspb.2017.2603>
- 725 Staley, Z. R., Chuong, J. D., Hill, S. J., Grabuski, J., Shokralla, S., Hajibabaei, M., & Edge, T. A.  
726 (2018). Fecal source tracking and eDNA profiling in an urban creek following an extreme rain  
727 event. *Scientific Reports*, 8, 14390. <https://doi.org/10.1038/s41598-018-32680-z>
- 728 Tessler, M., Weiskopf, S. R., Berniker, L., Hersch, R., McCarthy, K. P., Yu, D. W., & Siddall, M. E.  
729 (2018). Bloodlines: mammals, leeches, and conservation in southern Asia. *Systematics and*  
730 *Biodiversity*, 16, 488–496. <https://doi.org/10.1080/14772000.2018.1433729>
- 731 Thomsen, P. F., Iversen, L. L., Wiuf, C., Rasmussen, M., Gilbert, M. T. P., Orlando, L., &  
732 Willerslev, E. (2012). Monitoring endangered freshwater biodiversity using environmental  
733 DNA. *Molecular Ecology*, 21, 2565–2573. <https://doi.org/10.1111/j.1365-294X.2011.05418.x>
- 734 Thomsen, P. F., & Willerslev, E. (2015). Environmental DNA—an emerging tool in conservation  
735 for monitoring past and present biodiversity. *Biological Conservation*, 183, 4–18.  
736 <https://doi.org/10.1016/j.biocon.2014.11.019>
- 737 Ushio, M., Fukuda, H., Inoue, T., Makoto, K., Kishida, O., Sato, K., Murata, K., Nikaido, M., Sado,  
738 T., Sato, Y., Takeshita, M., Iwasaki, W., Yamanaka, H., Kondoh, M., & Miya, M. (2017).  
739 Environmental DNA enables detection of terrestrial mammals from forest pond water.  
740 *Molecular Ecology Resources*, 17(6), e63–e75. <https://doi.org/10.1111/1755-0998.12690>



- 741 Valentini, A., Taberlet, P., Miaud, C., Civade, R., Herder, J., Thomsen, P. F., Bellemain, E.,  
742 Besnard, A., Coissac, E., Boyer, F., Gaboriaud, C., Jean, P., Poulet, N., Roset, N., Copp, G. H.,  
743 Geniez, P., Pont, D., Argillier, C., Baudoin, J. -M., Peroux, T., Crivelli, A. J., Olivier, A.,  
744 Acqueberge, M., Le Brun, M., Møller, P. R., Willerslev, E., & Dejean, T. (2016). Next-  
745 generation monitoring of aquatic biodiversity using environmental DNA metabarcoding.  
746 *Molecular Ecology*, 25, 929–942. <https://doi.org/10.1111/mec.13428>
- 747 Visconti, P., Pressey, R. L., Giorgini, D., Maiorano, L., Bakkenes, M., Boitani, L., Alkemade, R.,  
748 Falcucci, A., Chiozza, F., & Rondinini, C. (2011). Future hotspots of terrestrial mammal loss.  
749 *Philosophical Transactions of the Royal Society B*, 366, 2693–2702.  
750 <https://doi.org/10.1098/rstb.2011.0105>
- 751 Wickham, H. (2016). *ggplot2: elegant graphics for data analysis*. Springer, New York, USA.  
752 <http://ggplot2.org>
- 753 Williams, K. E., Huyvaert, K. P., Vercauteren, K. C., Davis, A. J., & Piaggio, A. J. (2018). Detection  
754 and persistence of environmental DNA from an invasive, terrestrial mammal. *Ecology and*  
755 *Evolution*, 8, 688–695. <https://doi.org/10.1002/ece3.3698>
- 756 Zuur, A. F., Ieno, E. N., Walker, N., Saveliev, A. A., & Smith, G. M. (2009) *Mixed effects models*  
757 *and extensions in ecology with R*. Springer, New York, USA.  
758

759 **Table 1.** Ethogram used to catalogue mammal behaviours that occur in or near artificial  
760 waterbodies in captive enclosures. Importantly, this ethogram was designed to catalogue  
761 mammal behaviours potentially leading to eDNA deposition. Therefore, it may not be  
762 comparable to ethograms typically used in study of captive animals.

763

| <b>Behaviour</b>        | <b>Definition</b>                                                                                                                             |
|-------------------------|-----------------------------------------------------------------------------------------------------------------------------------------------|
| Swimming                | Mammal completely submerged in and moving through waterbody using limbs                                                                       |
| Bodypart in water       | Mammal partially submerged in waterbody, e.g. foot or tail in water                                                                           |
| Drinking                | Water taken into mouth and swallowed by mammal                                                                                                |
| Feeding                 | Food taken into mouth and swallowed by mammal in or near waterbody, e.g. otter and fish                                                       |
| Scratching              | Bodypart or external object in enclosure used by mammal to relieve itch near waterbody                                                        |
| Urinating/scent-marking | Liquid excretion passed by mammal in or near waterbody                                                                                        |
| Pooing                  | Solid excretion passed by mammal in or near waterbody                                                                                         |
| Sniffing                | Air visibly drawn through nose of mammal to detect a smell around waterbody, possibly involving contact with water                            |
| Standing                | Mammal motionless in or near waterbody                                                                                                        |
| Walking                 | Mammal moving around waterbody at a regular pace by lifting and setting down each foot in turn, never having both feet off the ground at once |
| Running                 | Mammal moving around waterbody at a speed faster than a walk, never having both or all the feet on the ground at the same time                |
| Vocalising              | Mammal producing sound while in or near waterbody                                                                                             |
| Grooming                | Mammal cleaning fur or skin with its tongue while in or near waterbody                                                                        |
| Resting                 | Mammal lying down or sitting in or near waterbody                                                                                             |
| Other                   | Behaviour exhibited in or near waterbody that does not conform to other categories, e.g. chasing tail                                         |
| Not visible             | Mammal moved to part of enclosure not visible to the observer                                                                                 |

764

765 **Table 2.** Summary of focal species studied at wildlife parks and their lifestyle. The number of  
 766 individuals present and waterbody size in enclosures is provided.

767

| Site                                             | Species                                              | Lifestyle       | Enclosure | Number of individuals | Waterbody size (m <sup>2</sup> ) |
|--------------------------------------------------|------------------------------------------------------|-----------------|-----------|-----------------------|----------------------------------|
| Wildwood Trust                                   | European otter<br>( <i>Lutra lutra</i> )             | Semi-aquatic    | 1         | 2                     | 162                              |
|                                                  | European water vole<br>( <i>Arvicola amphibius</i> ) | Semi-aquatic    | 1         | 4                     | 0.09                             |
|                                                  |                                                      |                 | 2         | 1                     | 0.09                             |
|                                                  | European beaver<br>( <i>Castor fiber</i> )           | Semi-aquatic    | 1         | 2                     | 100                              |
|                                                  |                                                      |                 | 2         | 1                     | 100                              |
|                                                  | European hedgehog<br>( <i>Erinaceus europaeus</i> )  | Ground-dwelling | 1         | 1                     | 0.04                             |
|                                                  |                                                      |                 | 2         | 2                     | 0.04                             |
|                                                  | European badger<br>( <i>Meles meles</i> )            | Ground-dwelling | 1         | 4                     | 1.73                             |
|                                                  | Red deer<br>( <i>Cervus elaphus</i> )                | Ground-dwelling | 1         | 8                     | 100                              |
|                                                  | Eurasian lynx<br>( <i>Lynx lynx</i> )                | Ground-dwelling | 1         | 2                     | 2                                |
|                                                  | Red squirrel<br>( <i>Sciurus vulgaris</i> )          | Arboreal        | 1         | 2                     | 0.01                             |
|                                                  |                                                      |                 | 2         | 3                     | 0.01                             |
|                                                  |                                                      |                 | 3         | 3                     | 0.01                             |
|                                                  |                                                      |                 | 4         | 2                     | 0.01                             |
| European pine marten<br>( <i>Martes martes</i> ) | Arboreal                                             | 1               | 1         | 2                     |                                  |
|                                                  |                                                      | 2               | 1         | 0.375                 |                                  |
| Highland Wildlife Park                           | Red squirrel<br>( <i>Sciurus vulgaris</i> )          | Arboreal        | NA        | NA                    | 0.25                             |
|                                                  | Eurasian lynx<br>( <i>Lynx lynx</i> )                | Ground-dwelling | 1         | 8                     | 2                                |
|                                                  | European beaver<br>( <i>Castor fiber</i> )           | Semi-aquatic    | 1         | 2                     | 50                               |
|                                                  | Red deer<br>( <i>Cervus elaphus</i> )                | Ground-dwelling | 1         | 30                    | NA                               |

768

769

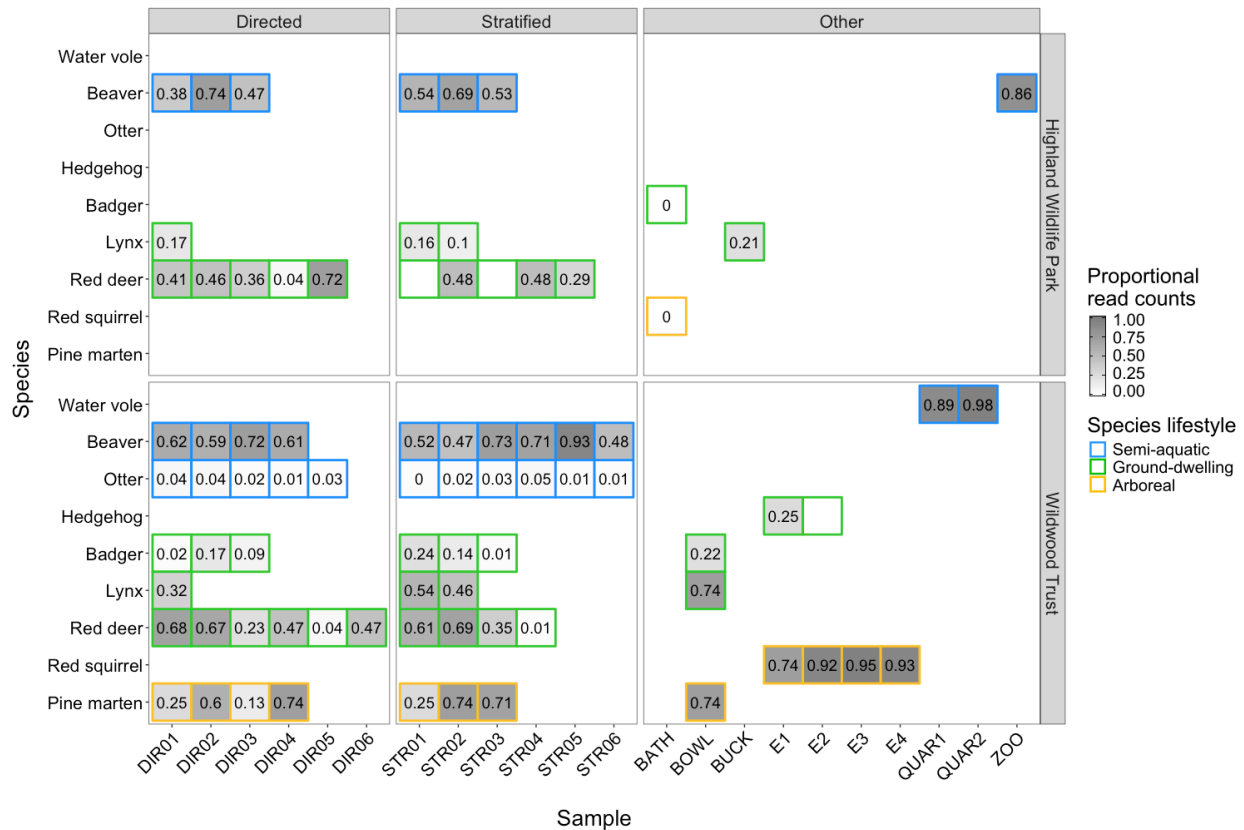

770

771 **Figure 1.** Heatmap showing proportional read counts for eDNA samples ( $n = 81$ ) from

772 Experiment 1. The heatmap is faceted by sample type (directed, stratified or other) and wildlife

773 park (Highland Wildlife Park or Wildwood Trust). Each cell represents an individual sample

774 taken from an enclosure containing the focal species in that row. Directed (DIR01-DIR06) and

775 stratified (STR01-STR06) samples were collected for each species from artificial waterbodies.

776 Samples were also collected from drinking containers (E1, E2, E3, E4, BOWL, BUCK), water vole

777 (QUAR1, QUAR2) and RZSS Edinburgh Zoo beaver (ZOO) enclosures, and a water bath (BATH) in

778 RZSS Highland Wildlife Park woods. The maximum proportional read count for each cell (i.e.

779 sample) is 1, if all reads from a particular sample belonged to the focal species. Cells containing

780 0 represent samples with proportional read counts less than 0.01 whereas empty cells are

781 samples with proportional read counts of exactly 0.

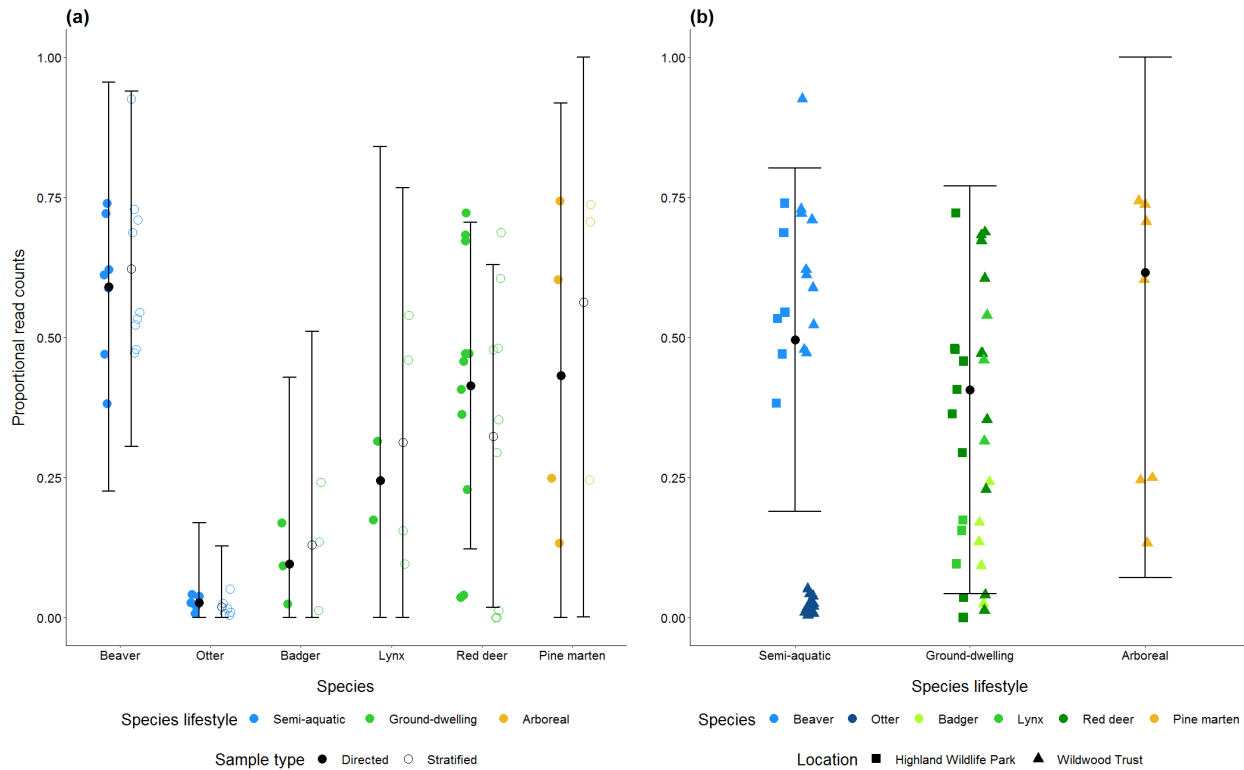

782

783 **Figure 2.** Relationships predicted by the binomial GLMMs between proportional read counts

784 and sample type nested within species **(a)** or species lifestyle **(b)** for Experiment 1. The

785 observed data (coloured points) are displayed against the predicted relationships (black points

786 with error bars) for each species **(a)** or species lifestyle **(b)**. Points are shaped by sample type **(a)**

787 or wildlife park **(b)**, and coloured by species lifestyle. Error bars represent the standard error

788 around the predicted means.

789

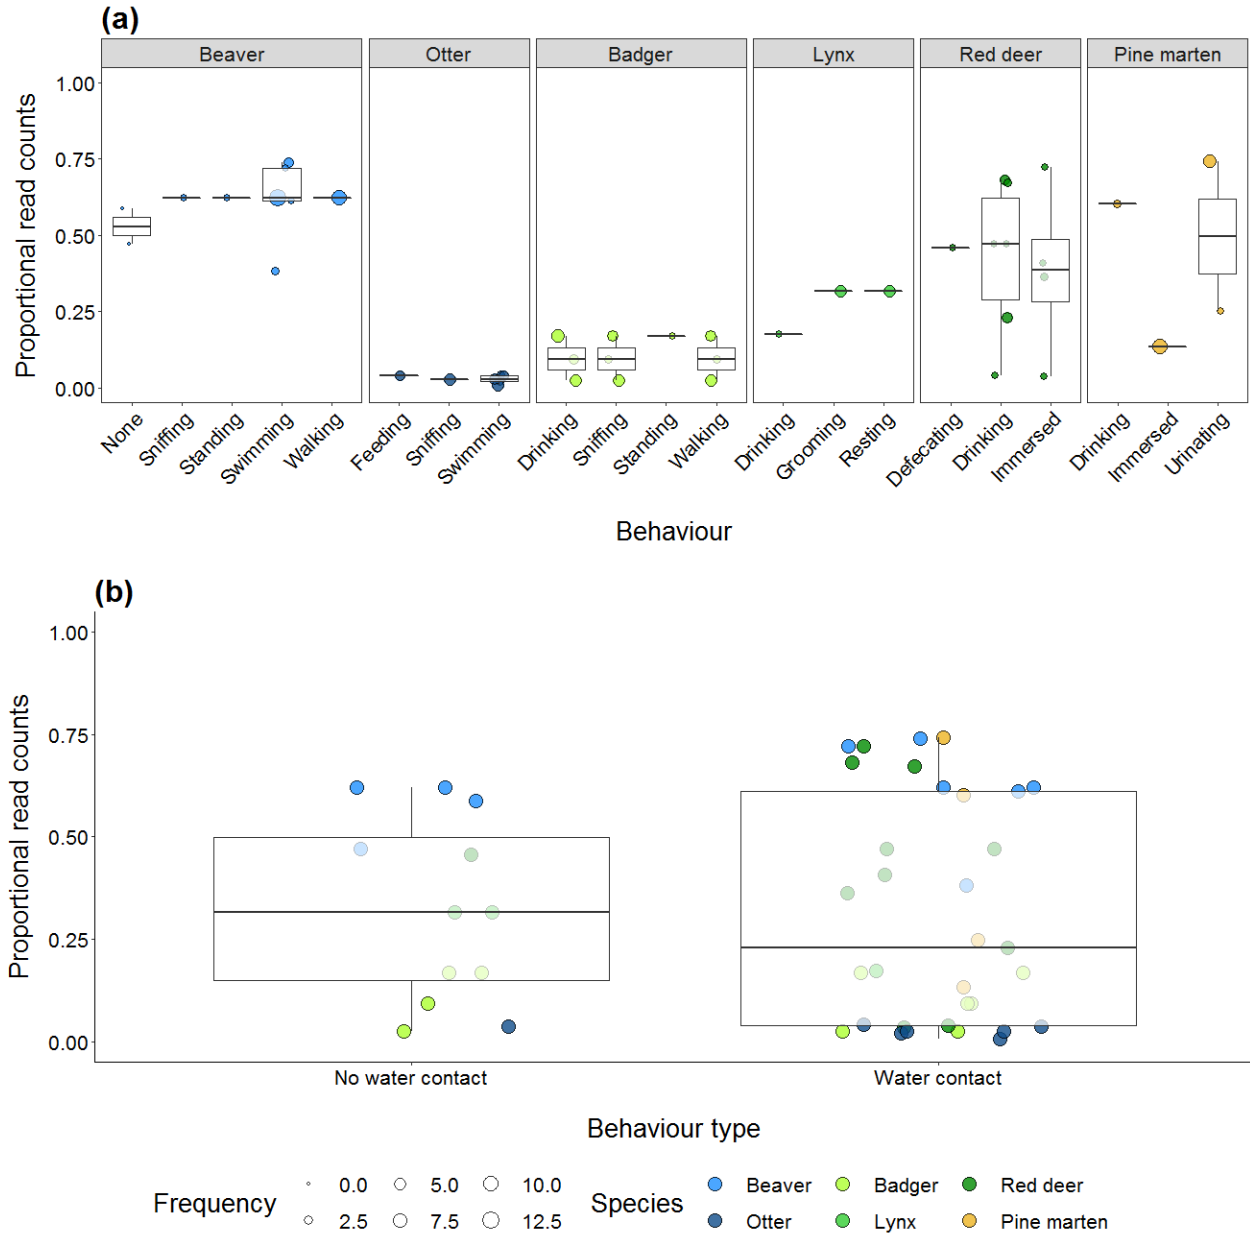

790

791 **Figure 3.** Boxplots showing the mean proportional read counts for specific **(a)** and generic **(b)**

792 behaviour(s) exhibited by focal species in Experiment 1. Boxes show 25th, 50th, and 75th

793 percentiles, and whiskers show 5th and 95th percentiles. Points are coloured by species

794 lifestyle, and each point in **(a)** represents a directed sample sized by frequency of behaviour.

795 The behaviour 'none' for beaver represents occurrences of beaver in water but out of view of

796 camera traps.

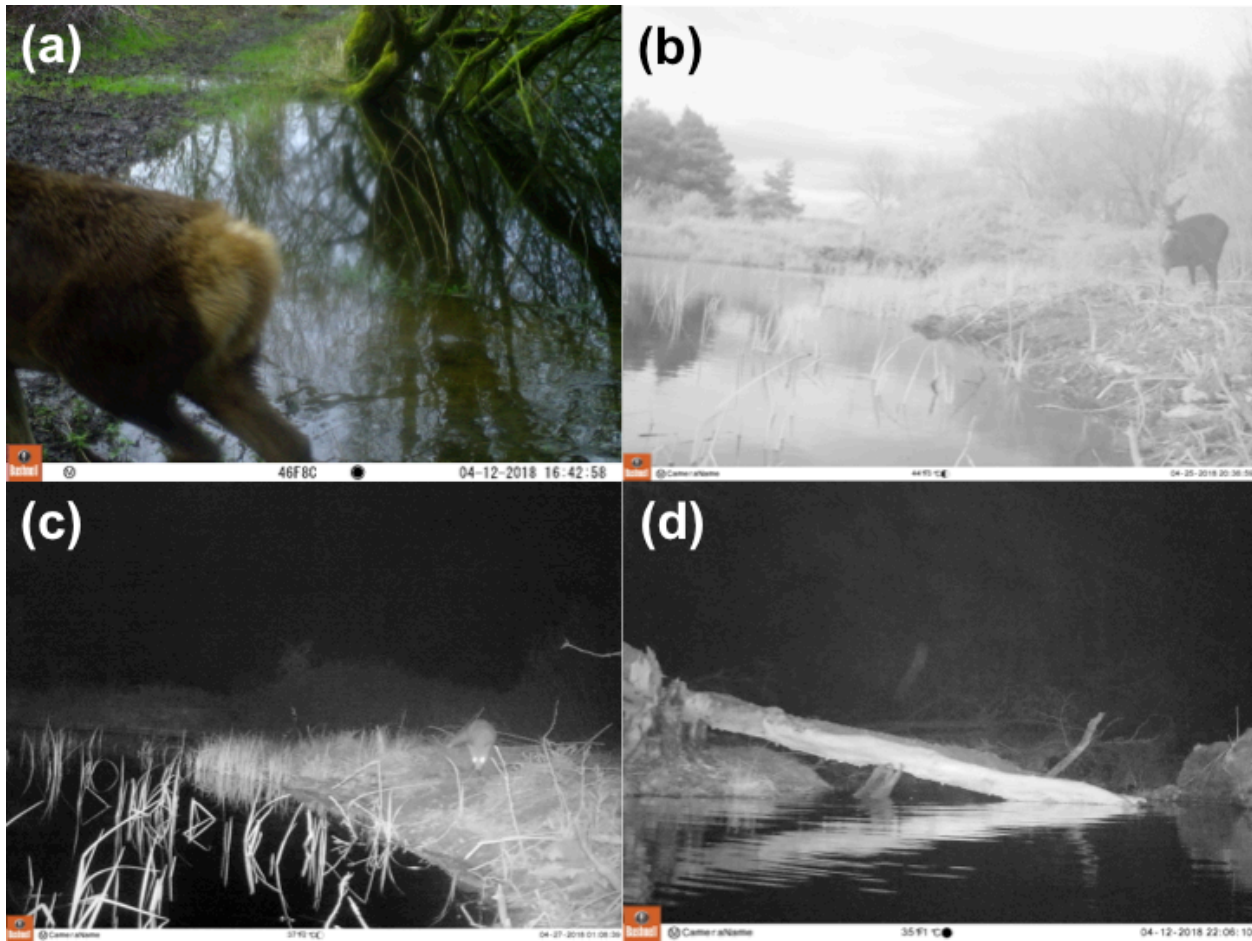

797

798 **Figure 4.** Exemplar camera trap photos taken at natural ponds where focal species were  
799 present in Experiment 2. Red deer was recorded at Thorne Moors **(a)**, roe deer **(b)** and red fox  
800 **(c)** were recorded at Tophill Low Nature Reserve, and beaver was recorded at the Bamff Estate  
801 **(d)**.

802

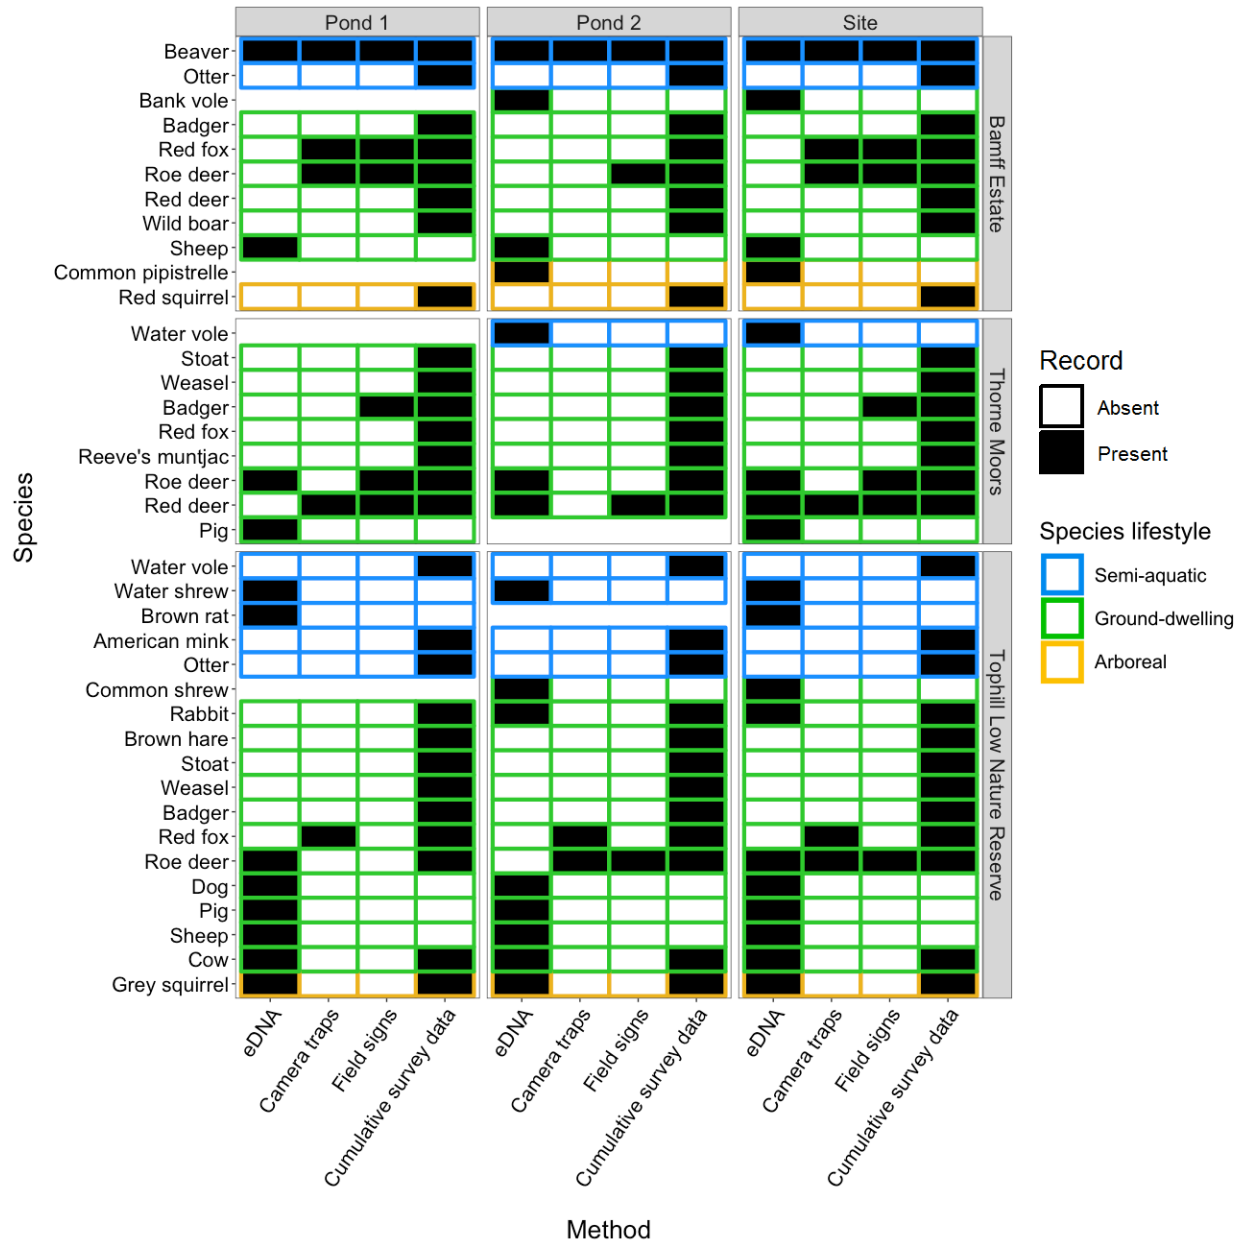

Source: https://www.biorxiv.org/content/biorxiv/early/2019/08/11/546218.full.pdf
